# Supplementary material for: Lehmann rotation of cholesteric droplets driven by Marangoni convection
Source: Royal Society of Chemistry journal article supplement (doi:10.1039/c8sm02574f), 2019-01-01
Supplement: c8sm02574f1.pdf [file c8sm02574f1.pdf]

## Lehmann rotation of cholesteric droplets driven by Marangoni convection

### Supplementary Video Captions

#### Video S1

Reversal of the sense of rotation of a "large" spiraling droplet ( $R = 15.5 \mu\text{m}$ ) when  $\Delta T$  passes from  $-5^\circ\text{C}$  to  $5^\circ\text{C}$  at  $T_{\text{ave}} = 27.5^\circ\text{C}$ . Note that the winding direction of the spiral also changes during the reversal, which means that the droplet turns back on itself.

#### Video S2

Reversal of the sense of rotation of a "small" spiraling droplet ( $R = 12.5 \mu\text{m}$ ) followed by its transformation into a banded droplet when  $\Delta T$  passes from  $5^\circ\text{C}$  to  $-5^\circ\text{C}$  at an average temperature of  $27.5^\circ\text{C}$ .

#### Video S3

Quadrupolar droplet of radius  $R = 11.1 \mu\text{m}$  changing sense of rotation when  $\Delta T$  passes from  $5^\circ\text{C}$  to  $-5^\circ\text{C}$ . In this case the texture remains unchanged.

#### Video S4

Big spiraling droplet ( $R = 21 \mu\text{m}$ ) destabilizing periodically when  $\Delta T = -5^\circ\text{C}$  at  $T_{\text{ave}} = 27.5^\circ\text{C}$ .

#### Video S5

Marangoni convection rolls visualized with two  $1.7 \mu\text{m}$  tracer particles in the vicinity of a cholesteric spiraling droplet ( $R = 11.5 \mu\text{m}$ ) with  $T_{\text{ave}} = 32.5^\circ\text{C}$  and  $\Delta T = 5^\circ\text{C}$ .

#### Video S6

Marangoni convection rolls visualized by multiple  $1.7 \mu\text{m}$  tracer particles in the vicinity of a nematic droplet ( $R = 14.3 \mu\text{m}$ ) with  $T_{\text{ave}} = 32.5^\circ\text{C}$  and  $\Delta T = 5^\circ\text{C}$ .

#### Video S7

Marangoni convection rolls visualized around the same droplet as in Video S6, but after inverting the sign of the temperature gradient,  $T_{\text{ave}} = 32.5^\circ\text{C}$  and  $\Delta T = -5^\circ\text{C}$ .
